# Supplementary material for: Enhancing of CO Uptake in Metal-Organic Frameworks by Linker Functionalization: A Multi-Scale Theoretical Study
Source: MDPI journal article supplement (doi:10.3390/chemistry4020043), 2022-06-16
Supplement: s1 [file s1]

Supporting Information for:

## Enhancing of CO uptake in Metal-Organic Frameworks by linker functionalization. A Multi-scale theoretical study

Charalampos G. Livas <sup>1</sup>, Emmanuel Tylianakis <sup>1,2</sup> & George E. Froudakis <sup>1</sup>

<sup>1</sup> Department of Chemistry, Voutes Campus, University of Crete, GR-71003 Heraklion Crete, Greece;

<sup>2</sup> Department of Materials Science and Technology, Voutes Campus, University of Crete, GR-71003 Heraklion Crete, Greece;

### Ab-initio results.

In order to calculate the global minimum energy and identify the energetically most favorable configuration of the two monomers, various initial configurations for the dimer  $C_6H_5-X\cdots CO$  were considered and optimized. Figure S1 shows the systems studied and their corresponding binding energies calculated at the MP2/6311++G\*\* level of theory. The binding energies were corrected for the Basis Set Superposition Error (BSSE) with the Counterpoise (CP) method as proposed by Boys and Bernardi [23], since BSSE correction is important for nonbonding interactions. The equation used to calculate the final binding energy of a dimer is:

$$BE = E_{dimer} - E_{linker}^{ghost} - E_{CO}^{ghost} + \Delta E_{deform} \quad (1)$$

where  $E_{dimer}$  is the total energy of the dimer,  $E_{linker}^{ghost}$  is the energy of the Benzene linker calculated at the dimer geometry in the presence of the ghost basis of CO molecule,  $E_{CO}^{ghost}$  is the energy of CO calculated at the dimer geometry in the presence of the ghost basis of the benzene modified linker, and  $\Delta E_{deform}$  is the deformation energy, defined as the difference between the isolated interacting molecules (CO and the Benzene modified linker) in the dimer geometry and their optimized structures. Figure S2 shows the global minimum configuration of all the complexes. All optimized structures are available upon requested

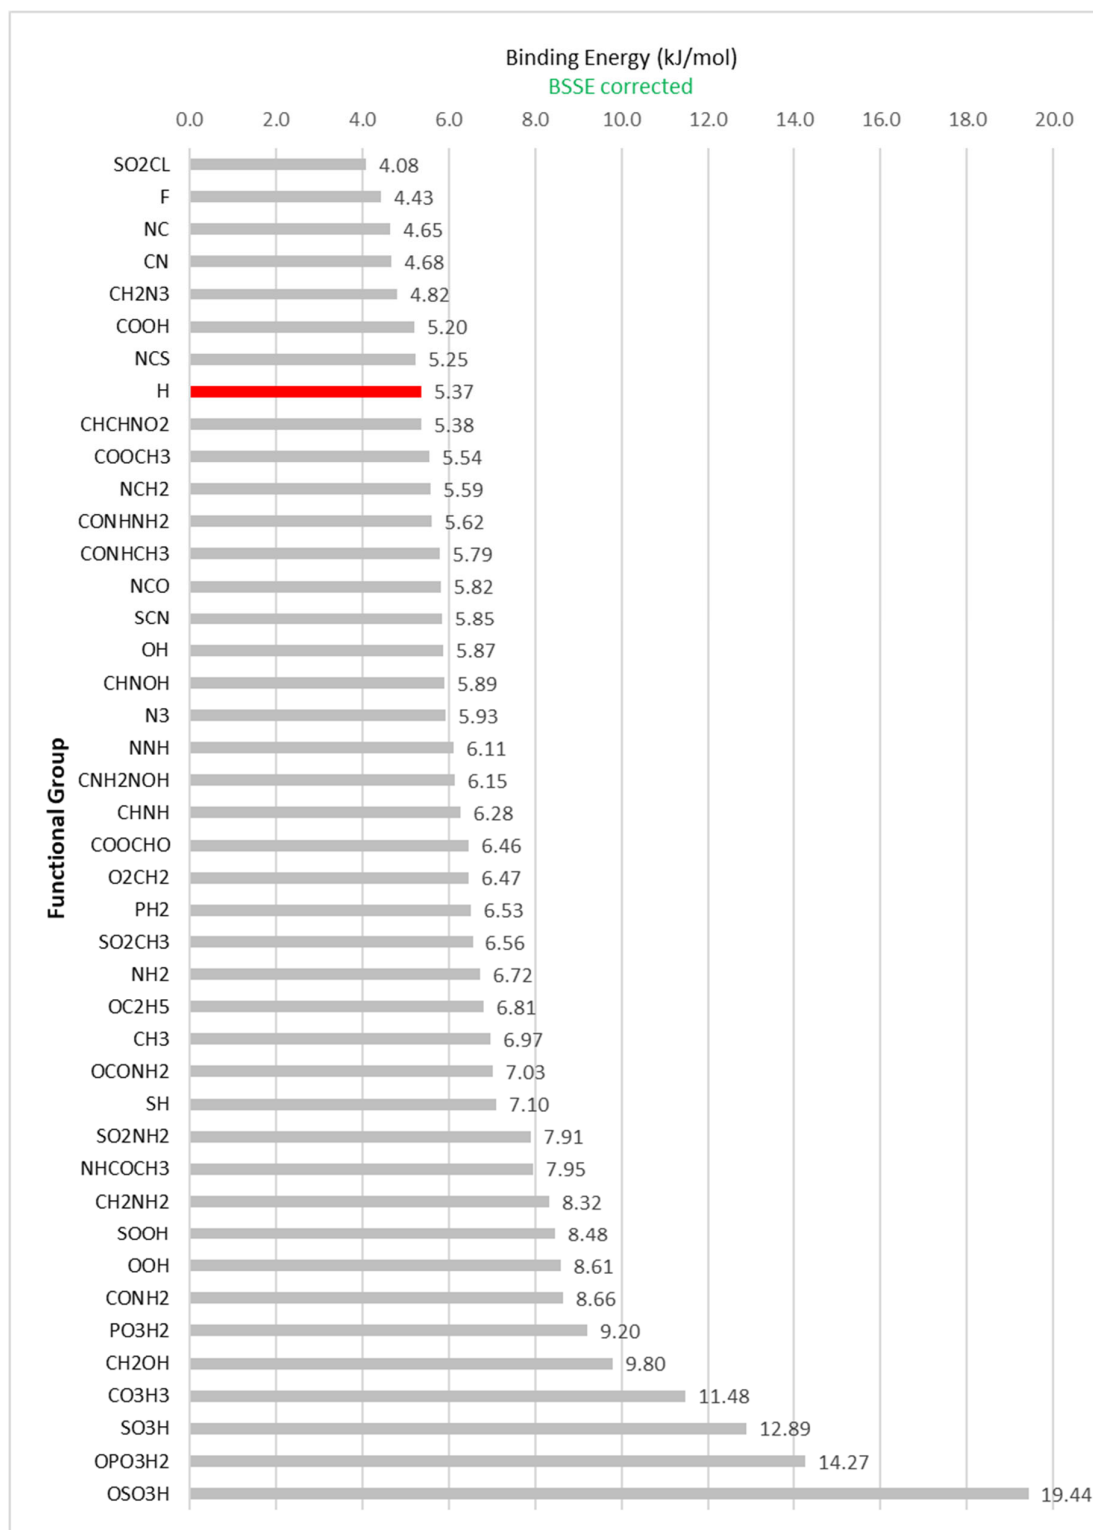

**Figure S1:** Sorted binding energies (kJ/mol) of the CO...C6H5-X systems under study, calculated at the MP2/6-311++G\*\* level of theory. All interaction energy values have been corrected for the Basis Set Superposition Error (BSSE) by the full counterpoise method [23].

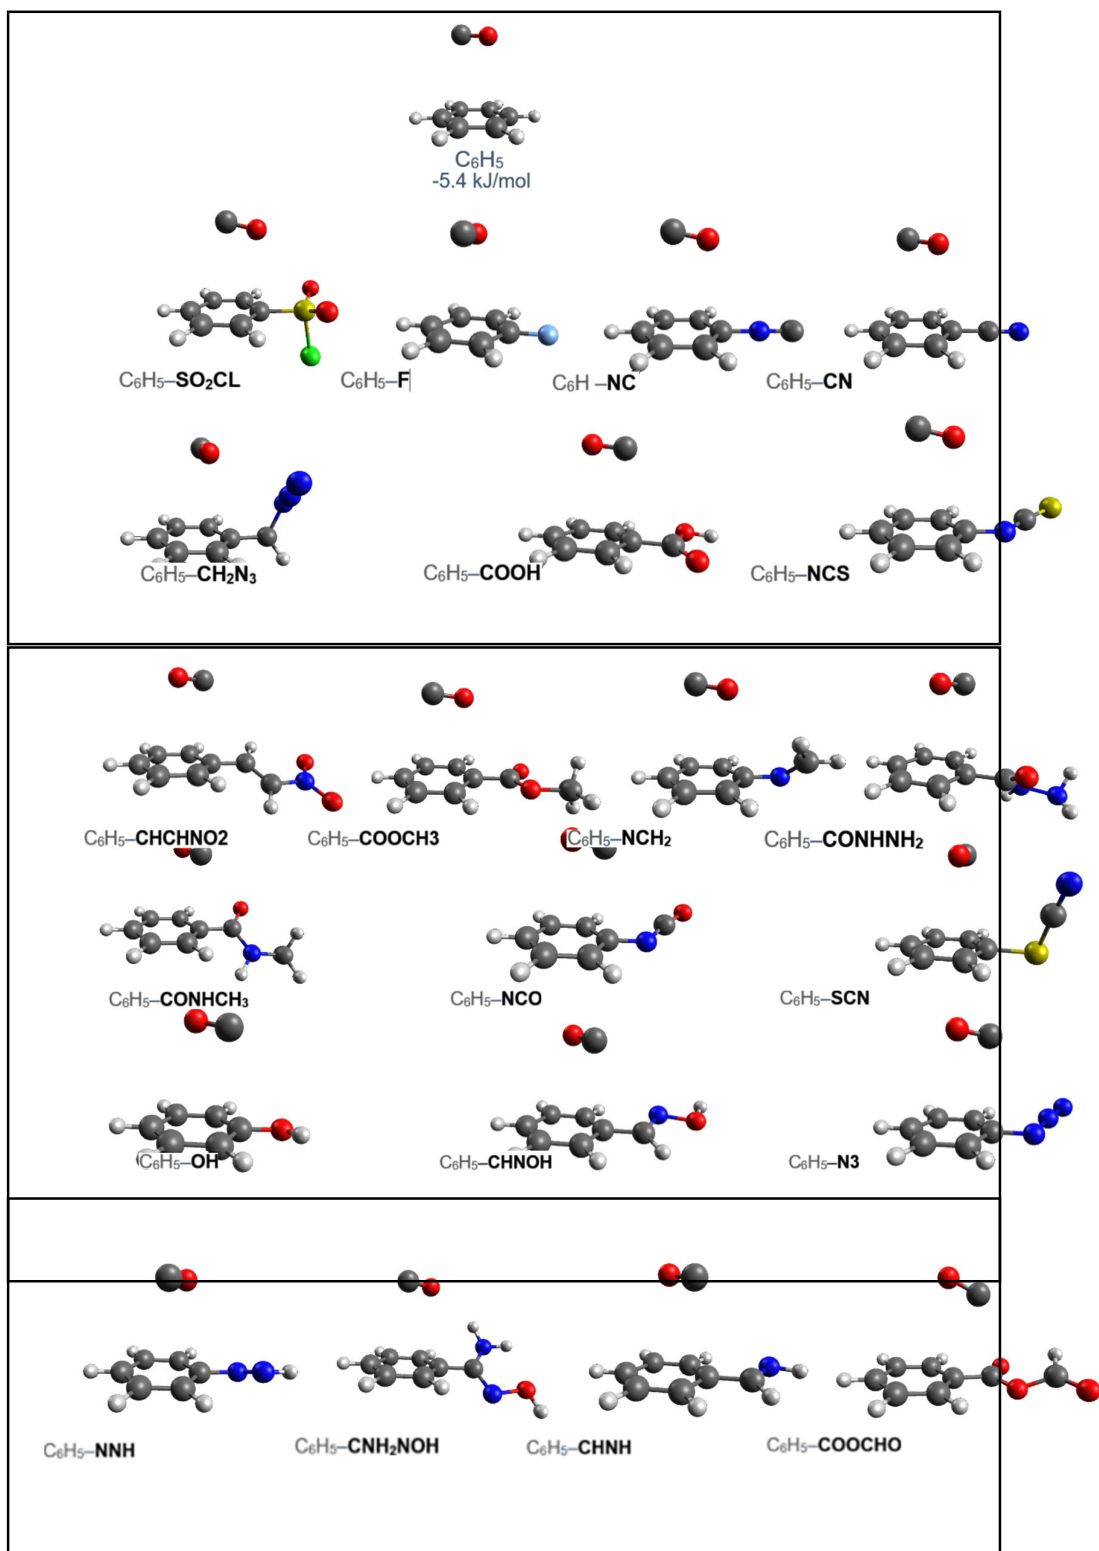

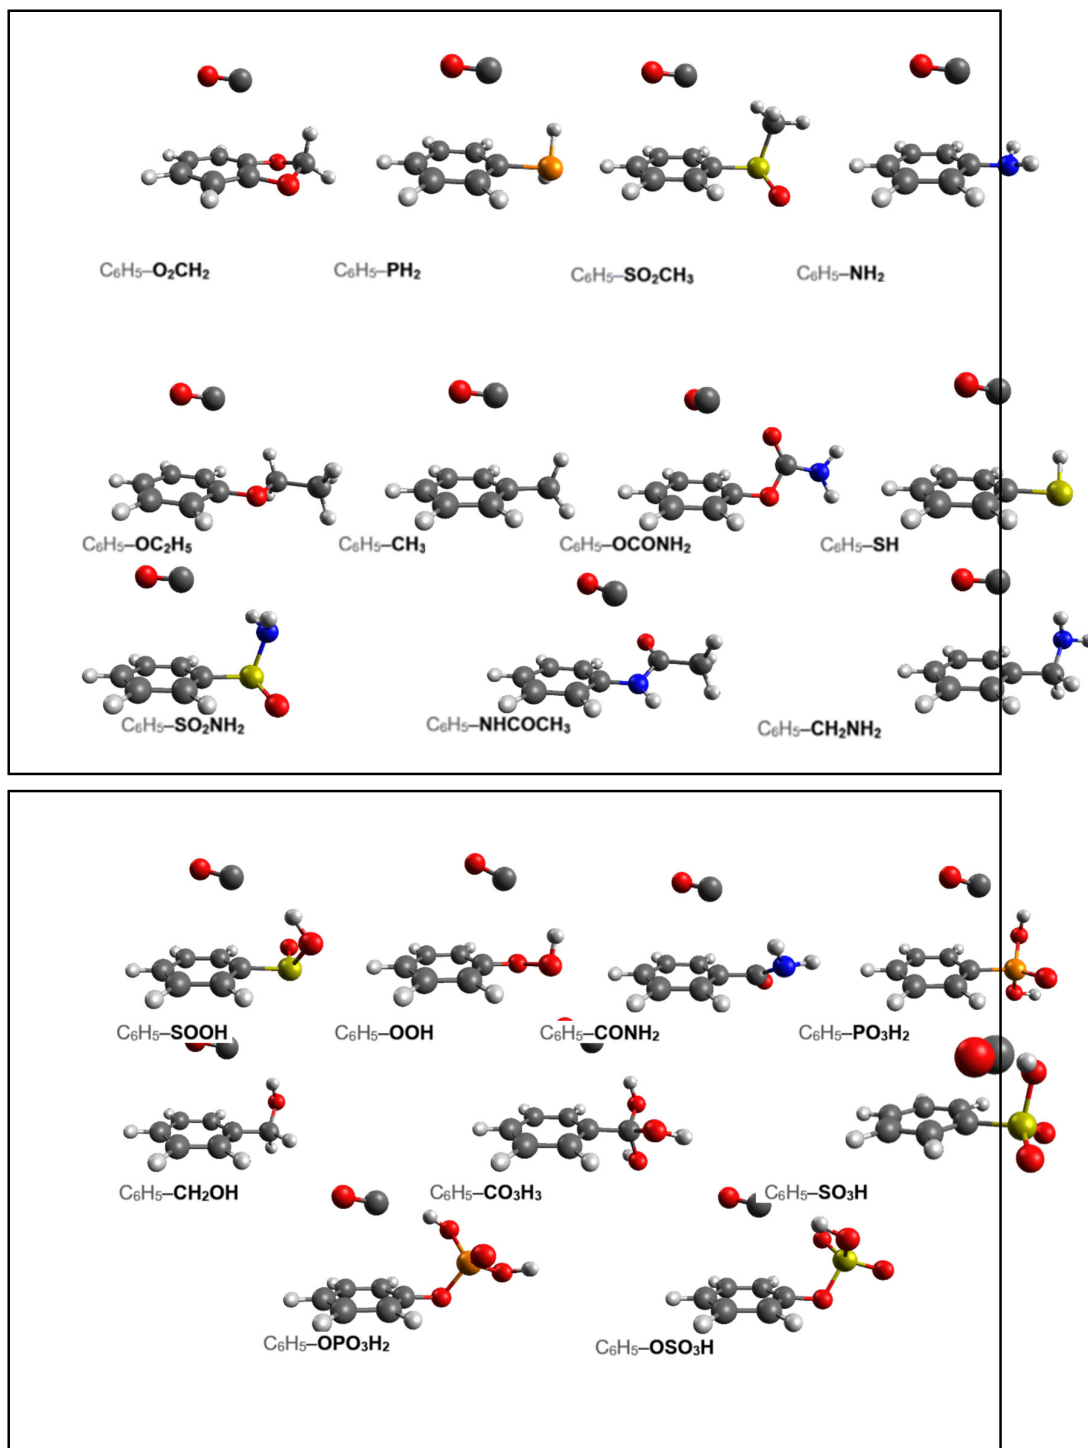

**Figure S2:** Global minima geometries of all the systems in this study.

For all the functionalized benzene molecules ( $C_6H_5-X$ ) colored electrostatic potential maps were generated, by mapping the calculated electrostatic potentials onto the 0.001 au electron density isosurface, using gOpenMol [30, 31].

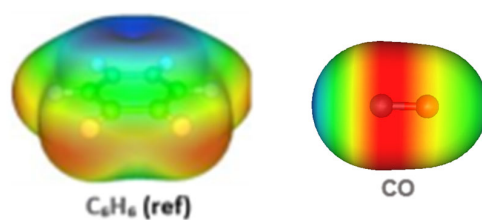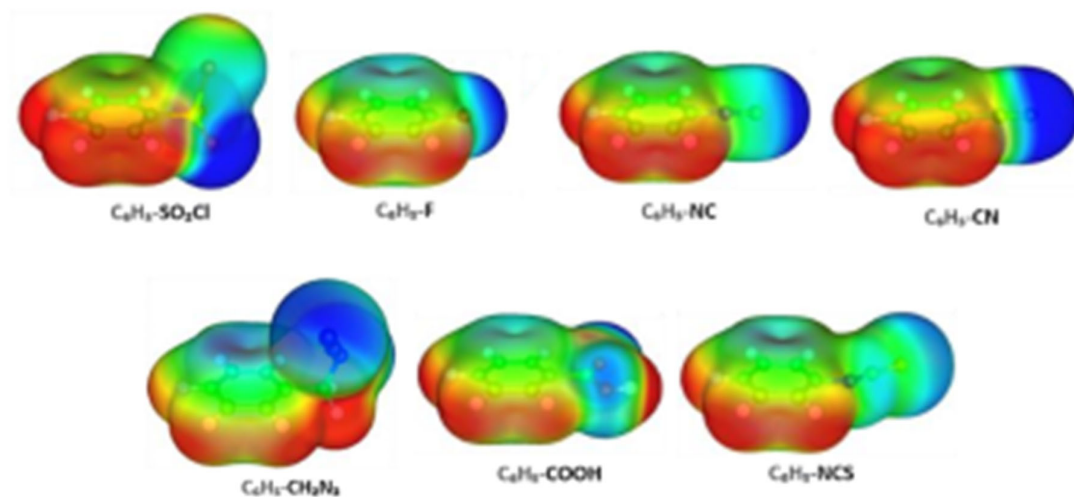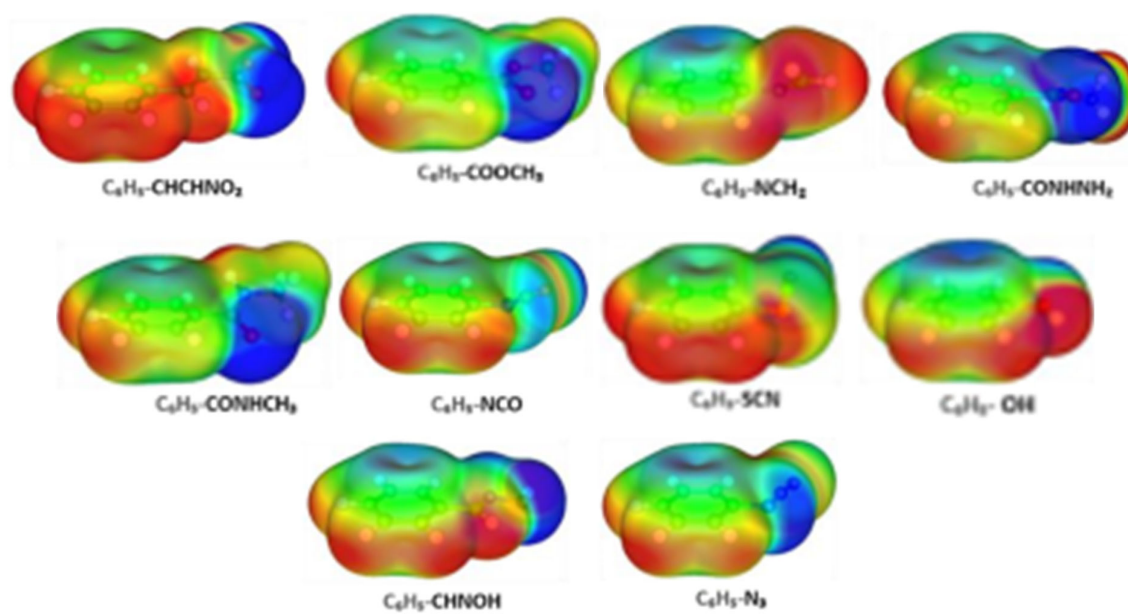

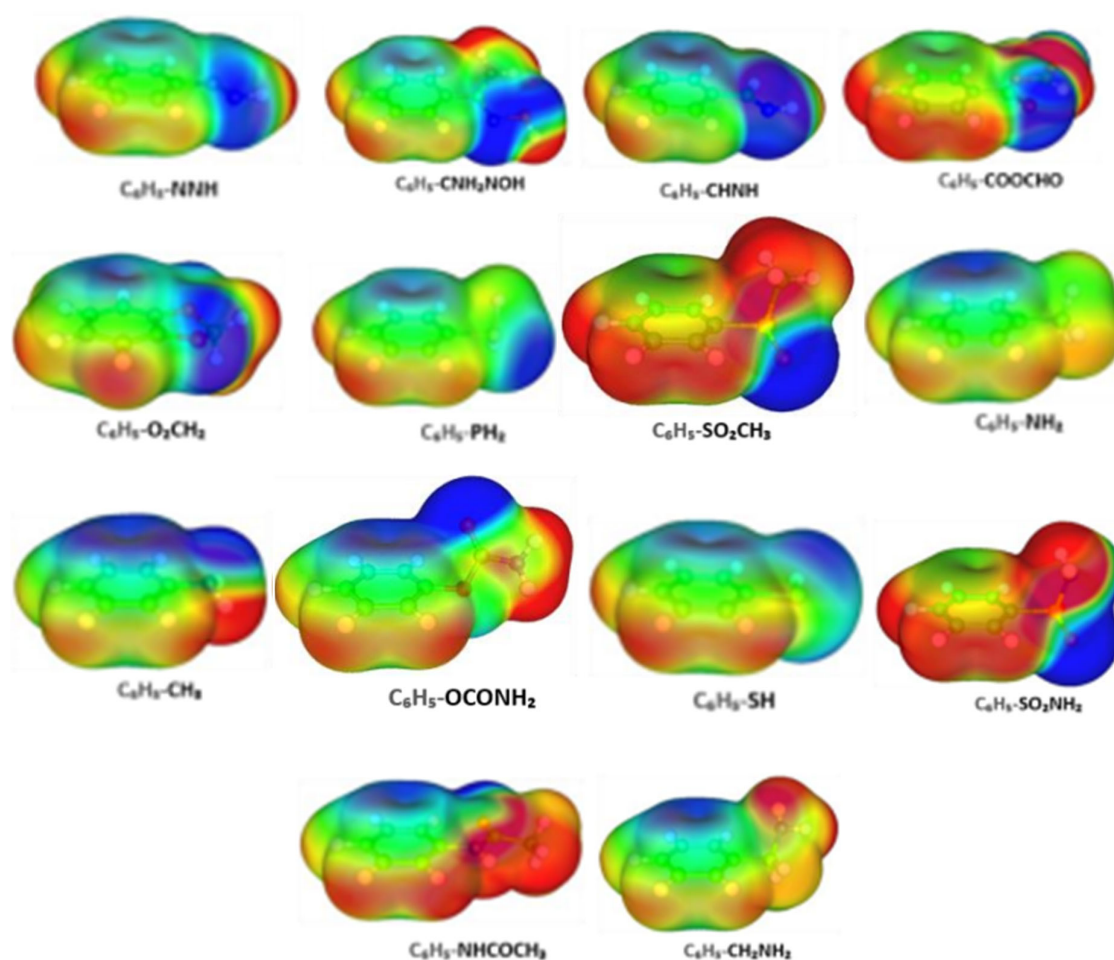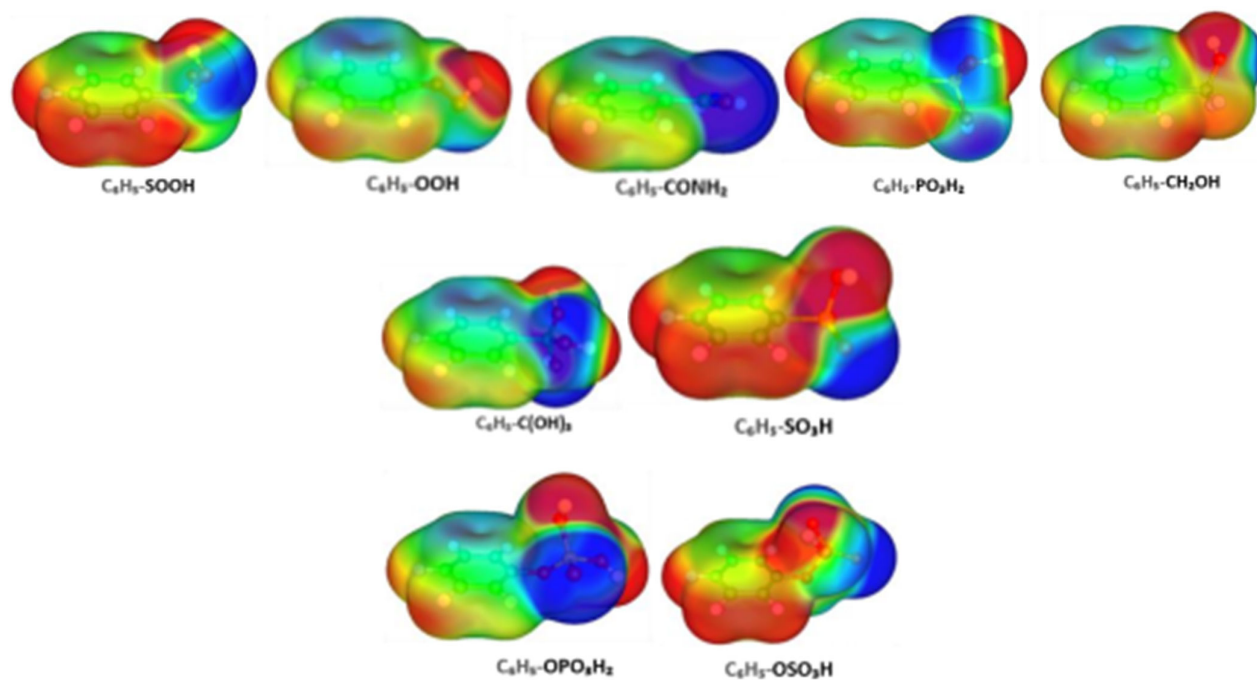



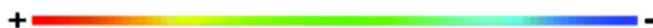

**Figure S3:** Electrostatic potential maps of the strongest interacting C<sub>6</sub>H<sub>5</sub>-X monomers. Calculated using the MP2/6-311++G\*\* method with ORCA 4.2 [21, 22] and visualized with gOpenMol. The varying intensities are ranging from -0.03 to +0.03 Hartree·e<sup>-1</sup>. Red: Electron-poor regions - high potential value, Blue: electron-rich regions - low potential.

It can be seen that the Carbon atom of the CO molecule is encompassed by a region of low electrostatic potential and the hydrogen atom of the top-performing FGs is enveloped by a region of high electrostatic potential. Taking into consideration the dimer complexes depicted in Figure S2, it can be concluded that there is an electrostatic interaction between the two atoms and that is the reason why the CO molecule orients itself that way.

Electron density redistribution plots were visualized at the MP2/6-311++G\*\* level of theory, as the difference of the electron density of the dimer minus the sum of the isolated monomers within the conformation of the dimer. The density of each monomer at the complex geometry was calculated in the presence of ghost basis functions of the other monomer. Densities were plotted with a contour value of 0.001 au by using gOpenMol and are shown in Figure S4.

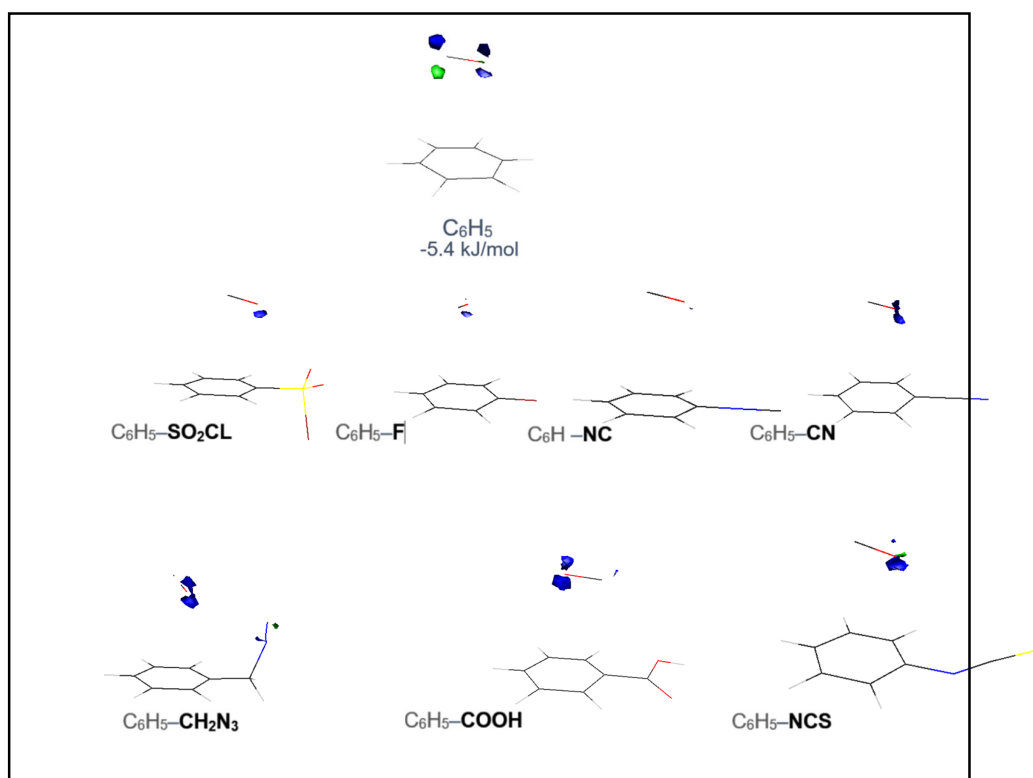

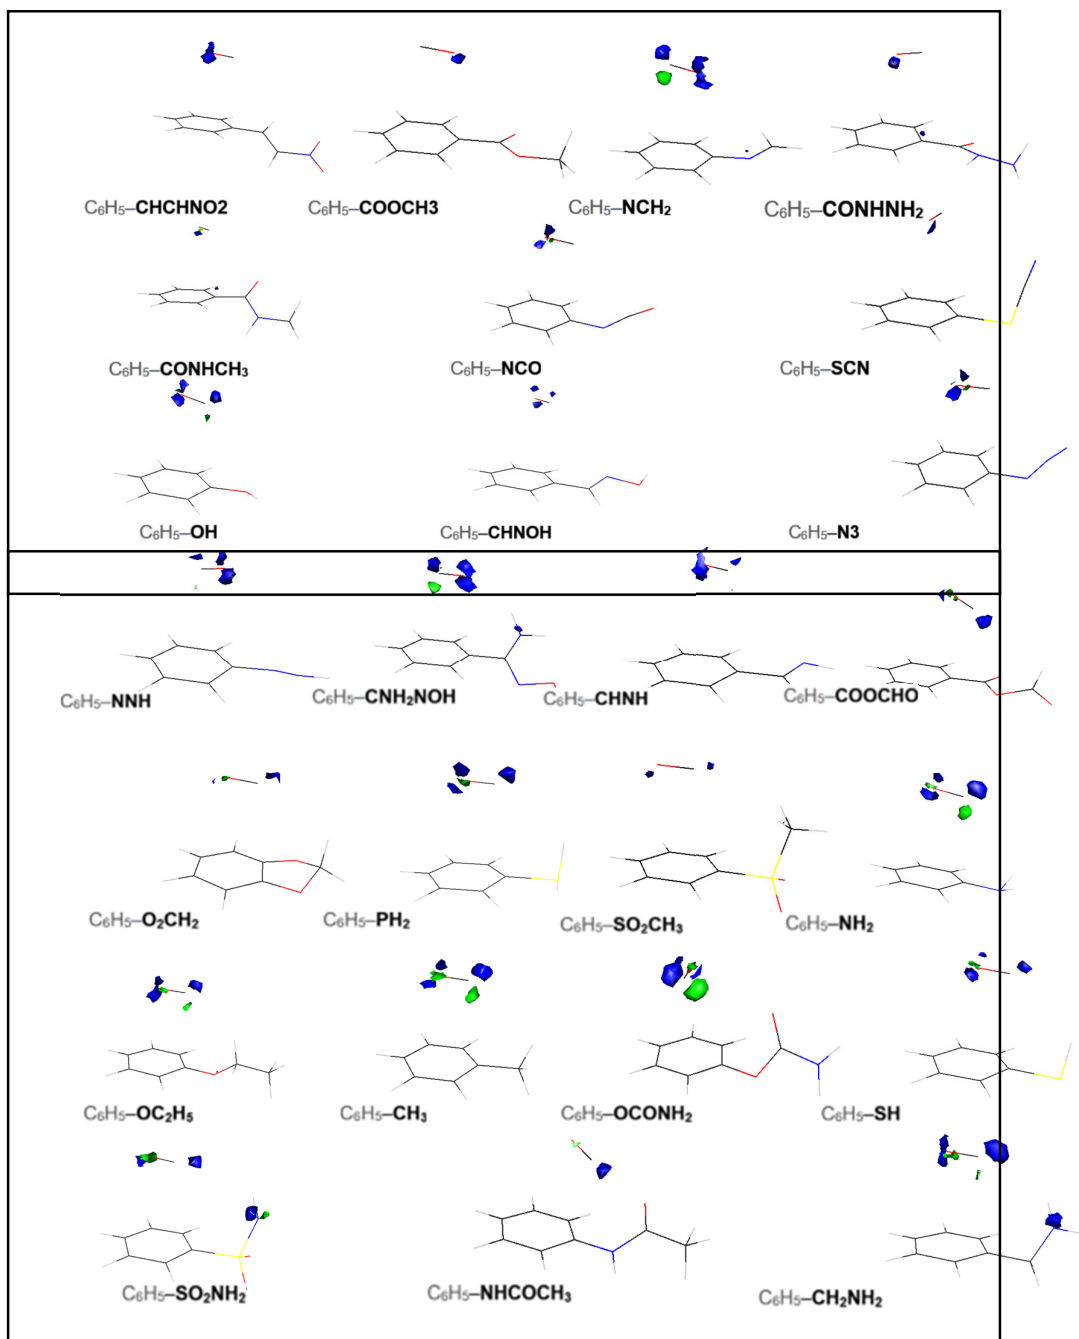



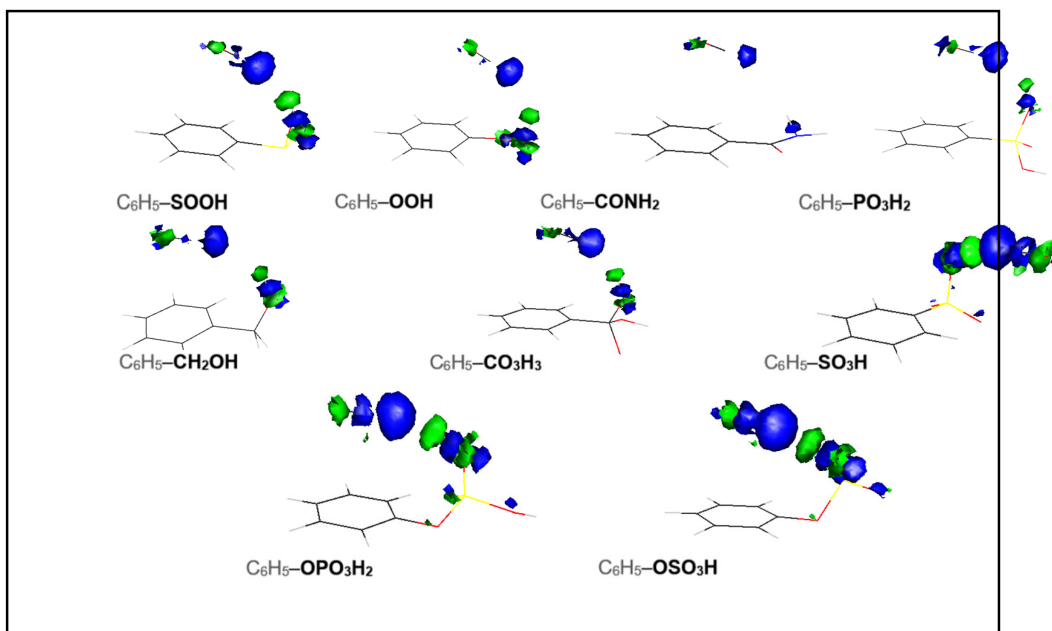

**Figure S4:** Electron-density redistribution plots of the optimized geometries of the  $\text{CO}\cdots\text{C}_6\text{H}_5\text{-X}$  complexes. With blue and green the regions that gain and lose electron density upon the formation of the complex, respectively.

#### Ab-initio derived interatomic potential fitting

Rigid scans were performed at the MP2/6-311++G\*\* level of theory to obtain the interaction energies between the Carbon Monoxide molecule and the  $\text{C}_6\text{H}_5\text{-X}$  monomer at selected distances around the global minimum. Each functional group contains many different atom-types with unique  $e,s$  parameters and must be fitted simultaneously. By fitting the specific curves for all different atoms using an in-home python algorithm, we get the parameter values for all atoms of the FG. All parameters were mixed using the Lorentz-Berthelot mixing rules [32, 33].

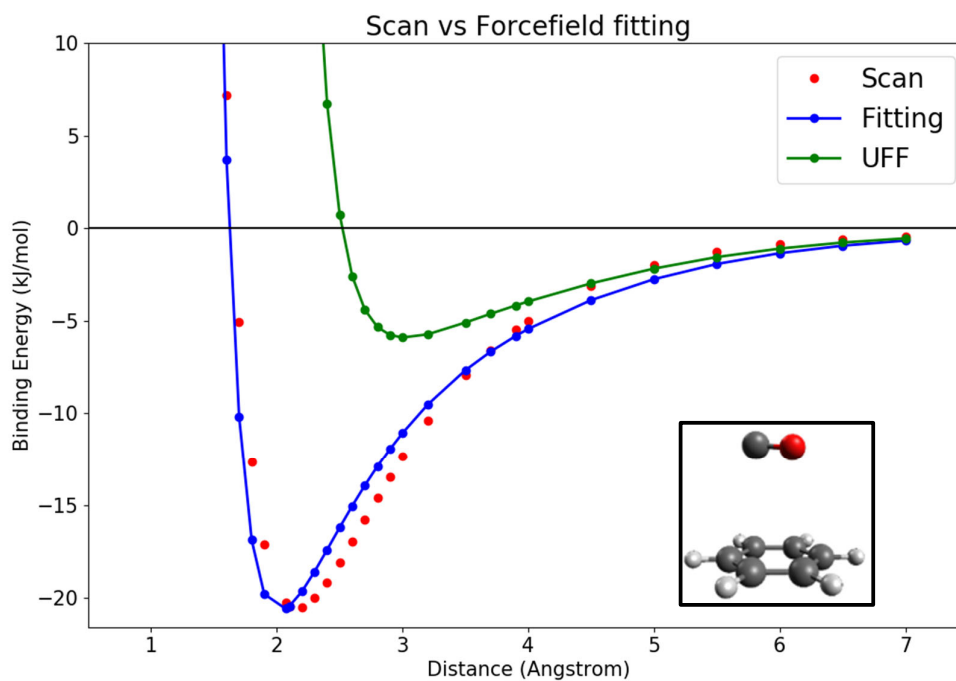

**Figure S5:** Fitting of the ( $\epsilon$ ,  $\sigma$ ) parameters of the UFF potential [27] on the QM data obtained from the ab-initio scan of CO over benzene.

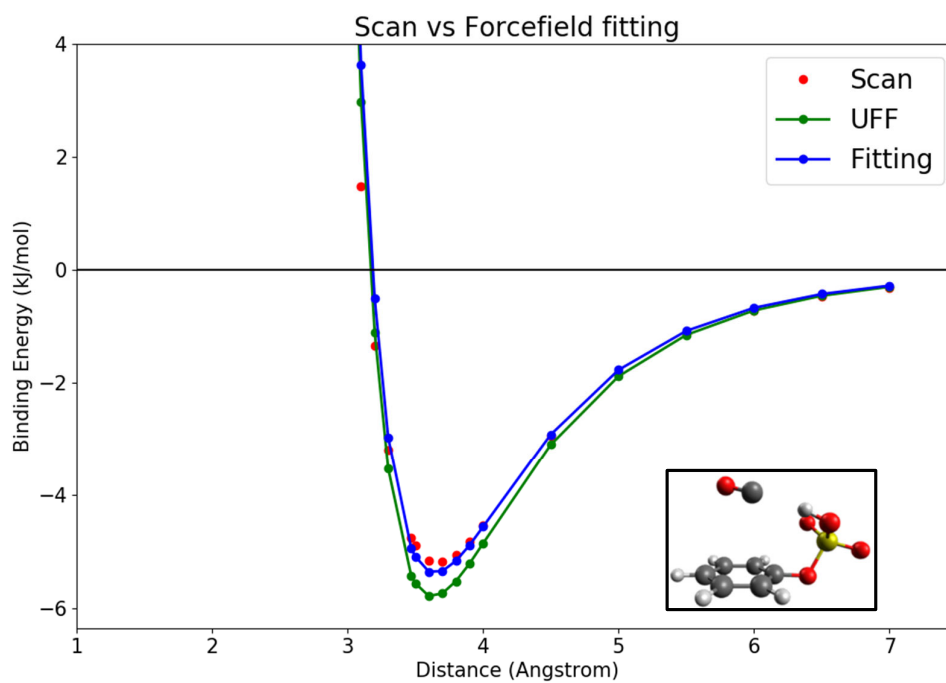

(a)

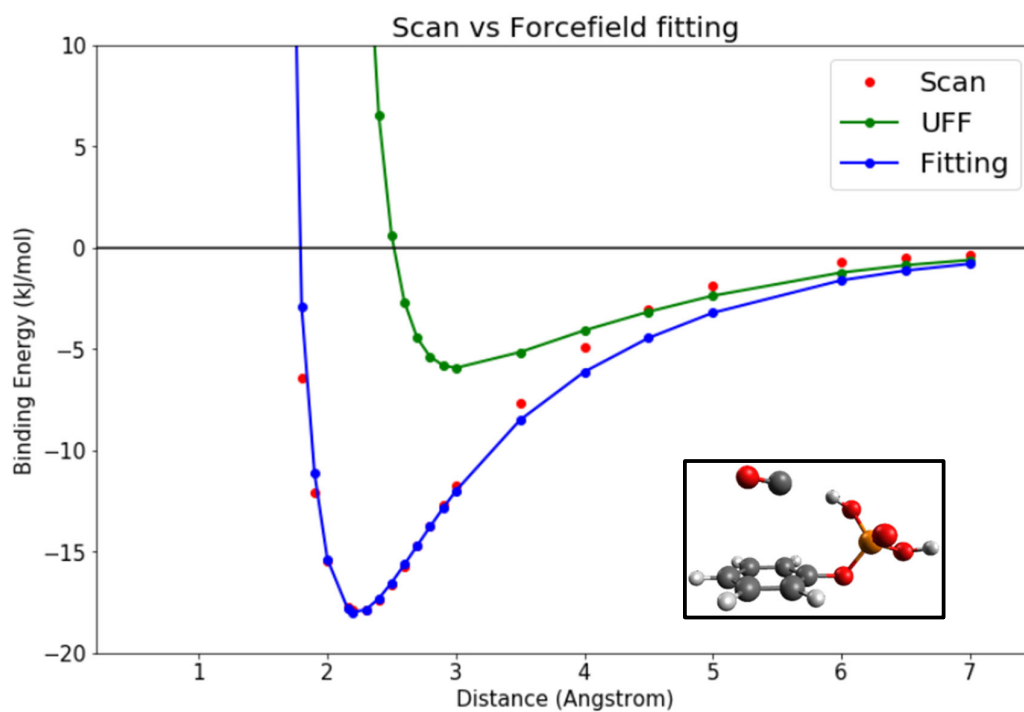

(b)

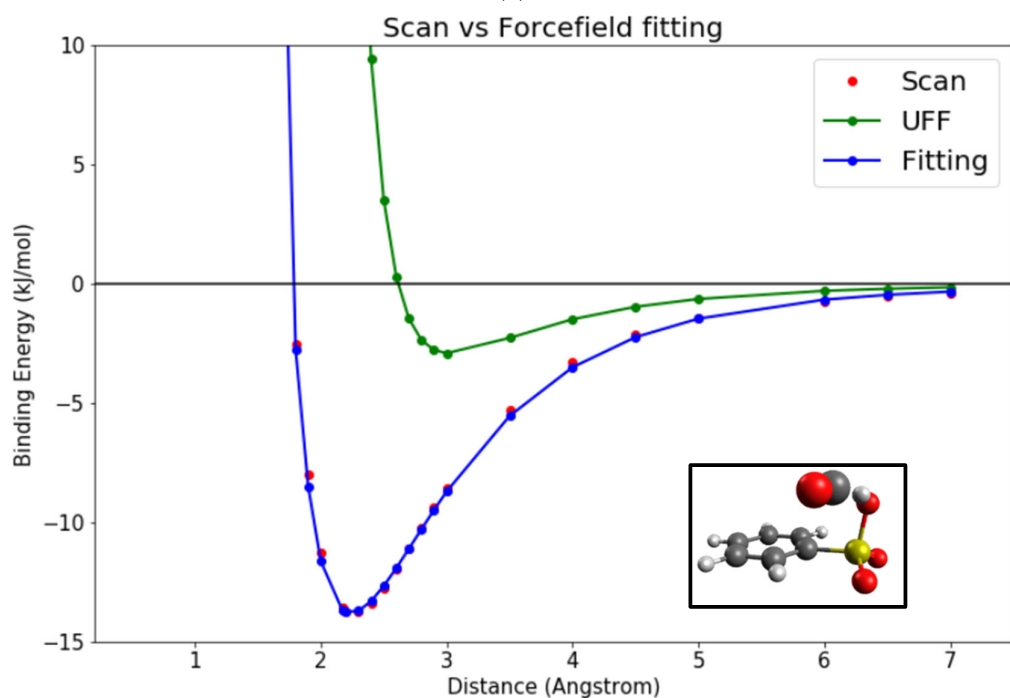

(c)

**Figure S6:** Fitting of the ( $\epsilon$ ,  $\sigma$ ) parameters of the UFF potential on the QM data obtained from the ab-initio scan of CO over (a) C<sub>6</sub>H<sub>5</sub>-OSO<sub>3</sub>H (b) C<sub>6</sub>H<sub>5</sub>-OPO<sub>3</sub>H<sub>2</sub> (c) C<sub>6</sub>H<sub>5</sub>-SO<sub>3</sub>H

The notable difference between UFF [27] and the ab-initio curve verifies the importance of the described fitting procedure and demonstrates the imminent danger of employing classical FFs without first checking their validity on the system under study.

### GCMC results

Using the cluster approximation, we separated the ligand from its environment and terminated the hydroxyl groups with a Li atom to represent the effect of the charge density of the missing metal cluster. All 3 functionalized linker geometries were taken from geometry optimizations performed at the MP2/6-311++G\*\* level of theory. For each structure, a cubic periodic box of size  $30.09 \times 30.09 \times 30.09 \text{ \AA}^3$  was used. The periodic box dimensions were large enough to ensure that no finite-size effects will affect the results. Initially, 50000 steps were conducted to let the system equilibrate. They were followed by 50000 production steps to calculate the average number of adsorbed molecules. This procedure was followed for each point of the isotherm uptake. The results from the GCMC simulations are depicted in Figure S7 where gravimetric (mmol/g) uptake and the volumetric ( $\text{cm}^3/\text{cm}^3$ ) are shown for  $T=298\text{K}$ .

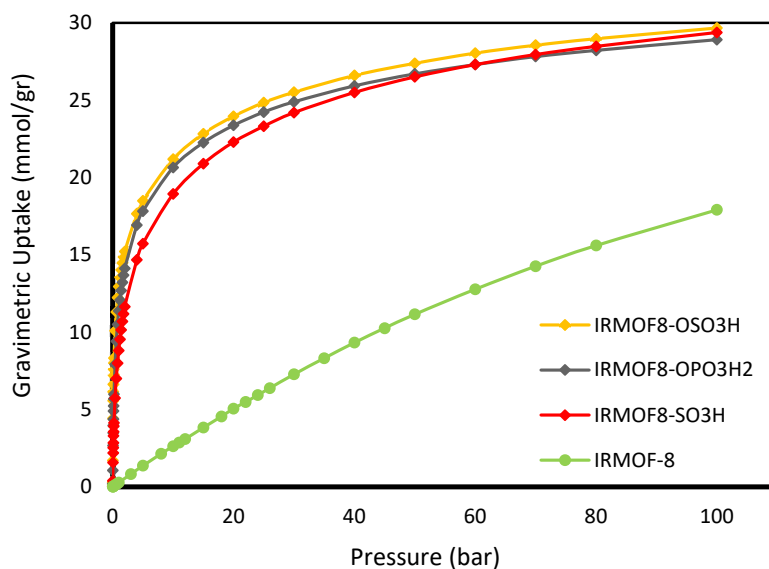

(a)

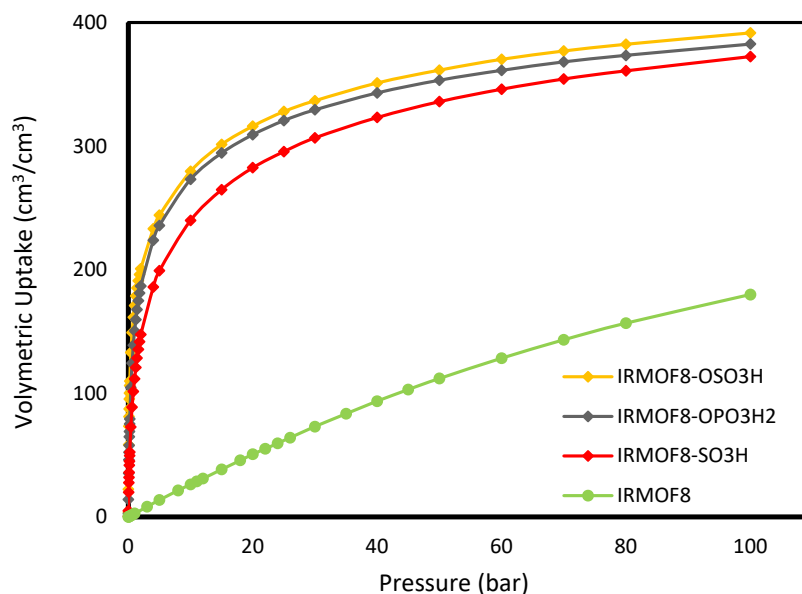

(b)

**Figure S7:** Gravimetric (a) and Volumetric (b) Carbon Monoxide uptake isotherms for IRMOF-8 and IRMOF-8-n (n: -OSO<sub>3</sub>H, -OPO<sub>3</sub>H<sub>2</sub>, -SO<sub>3</sub>H) at T=298K.

It can be clearly seen that the enhanced interaction of the functional groups with carbon monoxide, is reflected in the corresponding CO uptake of the modified IRMOF-8. The enhancement of the performance for the modified structures is more pronounced at the low loading limit i.e. the low-pressure range. This is expected since at this limit the adsorption is mainly defined by the interaction energy rather than other factors such as the pore volume and the surface area.

## References

- 21 Neese, F. The ORCA program system. *WIREs Comput. Mol. Sci.* **2012**, *2*, 73–78. <https://doi.org/10.1002/wcms.81>
- 22 Neese, F. Software update: The ORCA program system, version 4.0. *WIREs Comput. Mol. Sci.* **2018**, *8*, e1327. <https://doi.org/10.1002/wcms.1327>
- 23 Boys, S.; Bernardi, F. The calculation of small molecular interactions by the differences of separate total energies. Some procedures with reduced errors. *Mol. Phys.* **1970**, *19*, 553–566. <https://doi.org/10.1080/00268977000101561>
- 27 Rappe, A.; Casewit, C.; Colwell, K.; Goddard, W.; Skiff, W. UFF, a full periodic table force field for molecular mechanics and molecular dynamics simulations. *J. Am. Chem. Soc.* **1992**, *114*, 10024–10035. <https://doi.org/10.1021/ja00051a040>
- 30 Laaksonen, L. A graphics program for the analysis and display of molecular dynamics trajectories. *J. Mol. Graph.* **1992**, *10*, 33–34. [https://doi.org/10.1016/0263-7855\(92\)80007-Z](https://doi.org/10.1016/0263-7855(92)80007-Z)
- 31 Bergman, D.L.; Laaksonen, L.; Laaksonen, A. Visualization of solvation structures in liquid mixtures. *J. Mol. Graph. Model* **1997**, *15*, 301–206. [https://doi.org/10.1016/S1093-3263\(98\)00003-5](https://doi.org/10.1016/S1093-3263(98)00003-5).
- 32 Berthelot D. Sur le mélange des gaz. *Comptes Rendus Hebd Des Séances l'Académie Des Sci* **1898**;126:1703–855
- 33 Lorentz HA. Ueber die Anwendung des Satzes vom Virial in der kinetischen Theorie der Gase. *Ann Phys* **1881**;248:127–36. <https://doi.org/10.1002/andp.18812480110>.
